# Supplementary material
Source: publisher figshare collection journal article supplement (https://acs.figshare.com/ndownloader/files/4160419)
Supplement: Supplementary file 1 [file 4160419]

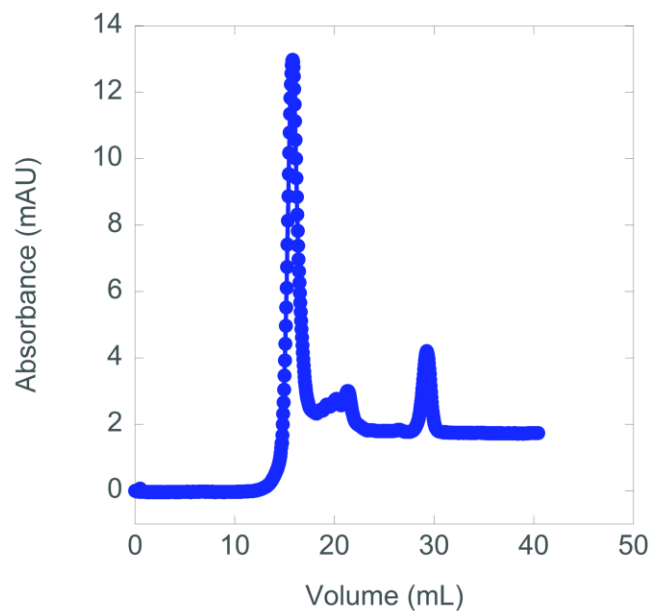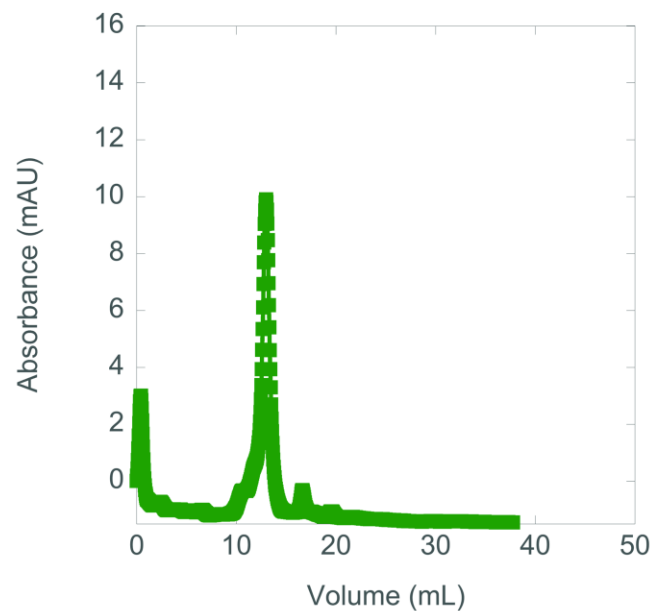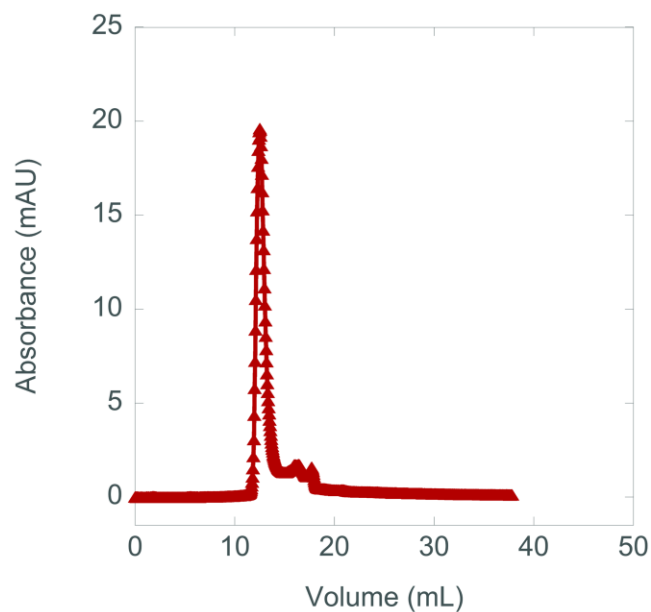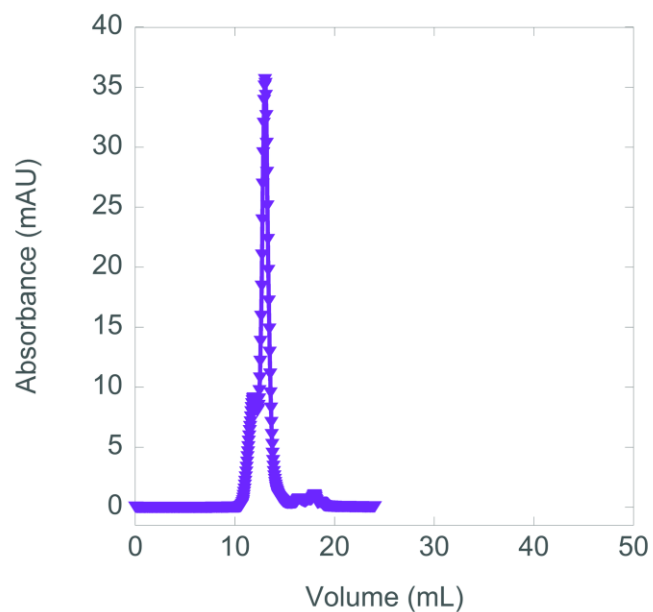

**Supplemental Figure 1. Size exclusion chromatographs of G6.5-COOH, G7-OH, and G7-NH<sub>2</sub> PAMAM dendrimer.** SEC profiles of G6.5-COOH-FITC (A), G7-OH-FITC (B), fractionated G7-NH<sub>2</sub> (C), and G7-NH<sub>2</sub>-FITC (D) PAMAM dendrimer. SEC was performed as described in Methods.

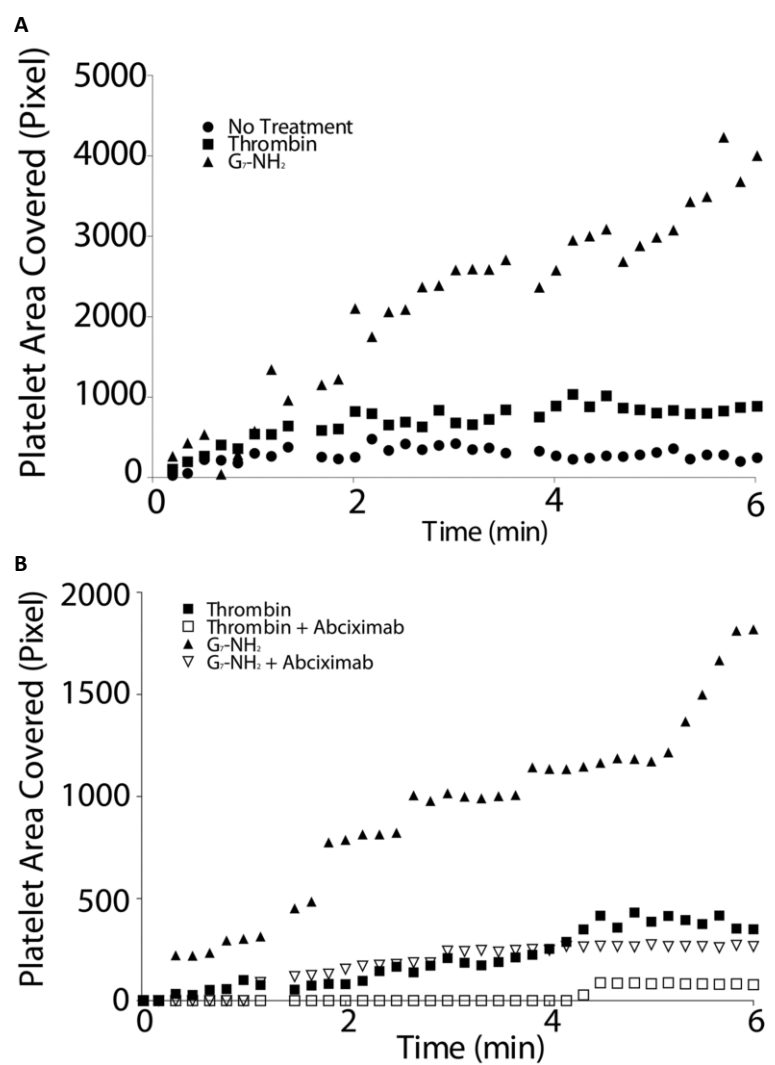

**Supplemental Figure 2. Platelets adhere faster and in greater numbers to fibrinogen under shear flow after G7-NH<sub>2</sub> dendrimer treatment.** Platelets were left untreated or stimulated with thrombin (0.5 U/mL) or G7-NH<sub>2</sub> dendrimer (100 µg/mL) for 5 minutes and flowed at 200 s<sup>-1</sup> for 6 minutes over Ibidi 0.4 VI plates pre-coated with 0.5 mg/mL fibrinogen. In some experiments, platelets were fluorescently labeled before treatment. Images were captured in real-time on an Olympus wide-field fluorescent microscope (IX-81 inverted microscope system) using an ORCA-ER monochrome CCD camera (1 Hz capture rate). In some experiments, platelets were pre-treated for 1 hour with abciximab (0.136 µM), a Fab fragment against  $\alpha_{IIb}\beta_3$ , before treatment with agonist. Abciximab-treated platelets had reduced adhesion to fibrinogen, independent of agonist treatment. Individual tracings for single experiments are depicted without (A) and with abciximab (B) and are representative of nine and six independent experiments, respectively.

A

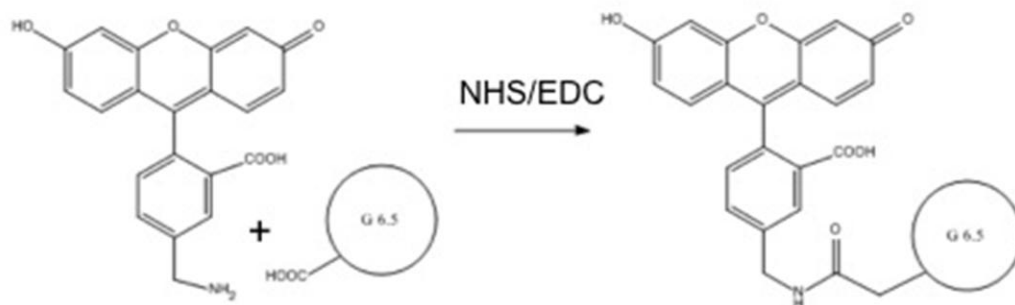

B

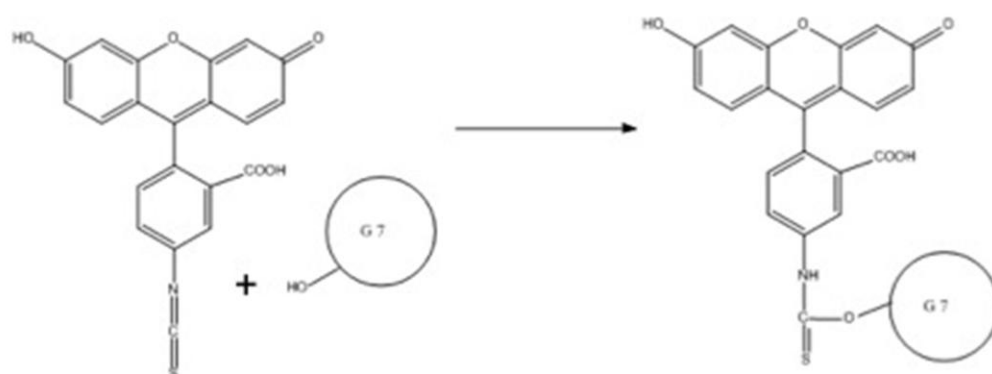

C

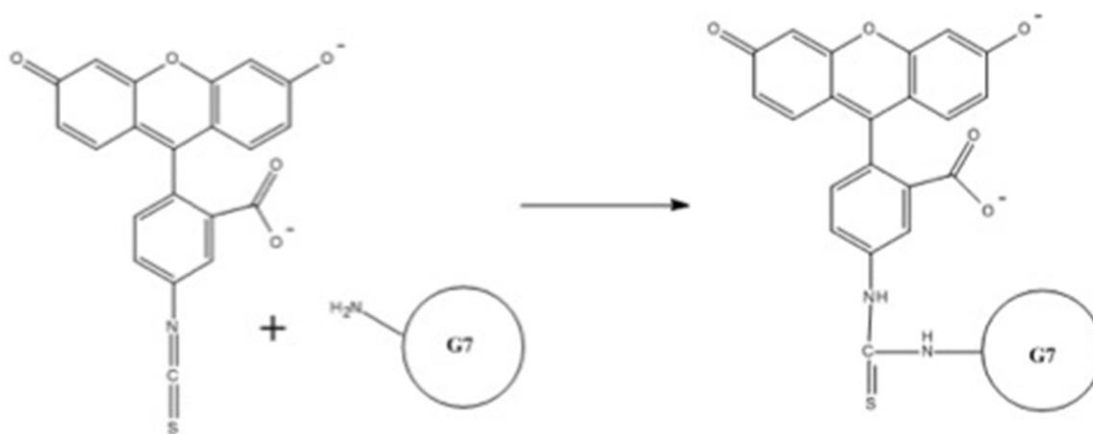

**Supplemental Scheme 1. Reaction schemes for fluorescent conjugation.** PAMAM dendrimers were labeled with fluorescein isothiocyanate (FITC) (for G7-NH<sub>2</sub> and G7-OH dendrimers) or 5-(aminomethyl)fluorescein (for G6.5-COOH dendrimers), as reported previously (reference 17).
